# Supplementary material
Source: publisher figshare collection journal article supplement (https://frontiersin.figshare.com/ndownloader/files/18147134)
Supplement: Supplementary file [file 18147134]

**Urinary Properdin and sC5b-9 are Independently Associated with Increased Risk for Graft Failure in Renal Transplant Recipients**

Rosa G.M. Lammerts<sup>1</sup>, Michele F. Eisenga<sup>1</sup>, Mohamed Alyami<sup>1</sup>, Mohamed R. Daha<sup>1</sup>, Marc A. Seelen<sup>1</sup>, Robert A. Pol <sup>2</sup>, Jacob van den Born<sup>1</sup>, Jan-Stefan Sanders<sup>1</sup>, Stephan J.L. Bakker<sup>1</sup>, Stefan P. Berger<sup>1</sup>, on behalf of the COMBAT Consortium

*1 Department of Nephrology, University Medical Center Groningen, University of Groningen, Netherlands*

*2 Department of Surgery, University Medical Center Groningen, University of Groningen, Netherlands*

**Correspondence and request for reprints to:**

Rosa G.M. Lammerts, M.D.

Department of Nephrology

University Medical Center Groningen

Hanzeplein 1, Z2.18, 9713 GZ Groningen

**Email:** [r.g.m.lammerts@umcg.nl](mailto:r.g.m.lammerts@umcg.nl)

**Supplementary Figure 1.** Association between urinary properdin and proteinuria excretion in the RTR. A restricted cubic spline is generated based on linear regression analyses. Knots are placed on 10th, 50th, and 90th percentile of proteinuria. Blue line represents coefficient, and pink band represents 95% confidence interval.

**Supplementary Figure 2.** Association between urinary soluble C5b-9 and proteinuria excretion in the RTR. A restricted cubic spline is generated based on linear regression analyses. Knots are placed on 10th, 50th, and 90th percentile of proteinuria. Blue line represents coefficient, and pink band represents 95% confidence interval.

**Supplementary Table 1.** Associations between detectable properdin and detectable sC5b-9 with all cause mortality in renal transplant recipients

|            | Detectable properdin |         | Detectable sC5b-9 |         | Both Properdin and sC5b-9 |         |
|------------|----------------------|---------|-------------------|---------|---------------------------|---------|
| Model      | HR (95% CI)          | P-value | HR (95% CI)       | P-value | HR (95% CI)               | P-value |
| Univariate | 1.58 (1.11-2.25)     | 0.01    | 1.39 (0.92-2.11)  | 0.12    | 2.11 (1.28-3.46)          | 0.003   |
| Model 1    | 1.43 (0.98-2.09)     | 0.07    | 1.06 (0.71-1.72)  | 0.66    | 1.87 (1.13-3.11)          | 0.02    |
| Model 2    | 1.37 (0.93-2.00)     | 0.11    | 1.05 (0.67-1.64)  | 0.83    | 1.70 (1.01-2.86)          | 0.05    |
| Model 3    | 1.30 (0.88-1.91)     | 0.19    | 1.00 (0.64-1.59)  | 0.99    | 1.20 (0.68-2.11)          | 0.53    |
| Model 4    | 1.13 (0.75-1.70)     | 0.57    | 0.85 (0.53-1.33)  | 0.50    | 0.93 (0.52-1.66)          | 0.80    |

**Model 1:** adjustment for age, sex, primary renal disease, time since transplantation at inclusion, eGFR, HLA mismatches and donor type; **model 2** = model 1 + adjustment for hs-CRP, **model 3** = model 2 + adjustment for systolic blood pressure, and smoking, **model 4** = model 3 + adjustment for proteinuria.

Reference group defined as patients with neither urinary properdin or sC5b-9, with a hazard ratio of 1.0.

**Supplementary Table 2.** Associations between urinary properdin and sC5b-9 as continuous variables with all cause mortality in RTR

|            | Ln properdin     |                 | Ln sC5b-9        |                 |
|------------|------------------|-----------------|------------------|-----------------|
| Model      | HR (95% CI)      | <i>P</i> -value | HR (95% CI)      | <i>P</i> -value |
| Univariate | 1.16 (1.05-1.27) | 0.003           | 1.26 (1.08-1.48) | 0.004           |
| Model 1    | 1.12 (1.01-1.24) | 0.03            | 1.16 (0.97-1.38) | 0.11            |
| Model 2    | 1.10 (1.00-1.22) | 0.06            | 1.14 (0.95-1.37) | 0.15            |
| Model 3    | 1.09 (0.99-1.21) | 0.08            | 1.10 (0.91-1.33) | 0.31            |
| Model 4    | 1.06 (0.96-1.18) | 0.27            | 1.01 (0.83-1.23) | 0.92            |

**Model 1:** adjustment for age, sex, primary renal disease, and time since transplantation at inclusion, eGFR, HLA mismatches and donor type; **model 2** = model 1 + adjustment for hs-CRP, **model 3**= model 2 + adjustment for systolic blood pressure, and smoking, **model 4** = model 3 + adjustment for proteinuria
